# Supplementary material for: Hypoxia-induced mitochondrial abnormalities in cells of the placenta
Source: PubMed Central journal article supplement (PMC7802931; doi:10.1371/journal.pone.0245155), 2021-01-12
Supplement: pone.0245155.s001.pdf [file pone.0245155.s001.pdf]

# Blot I BeWo cells (3 replicates, 1<sup>st</sup> experiment)

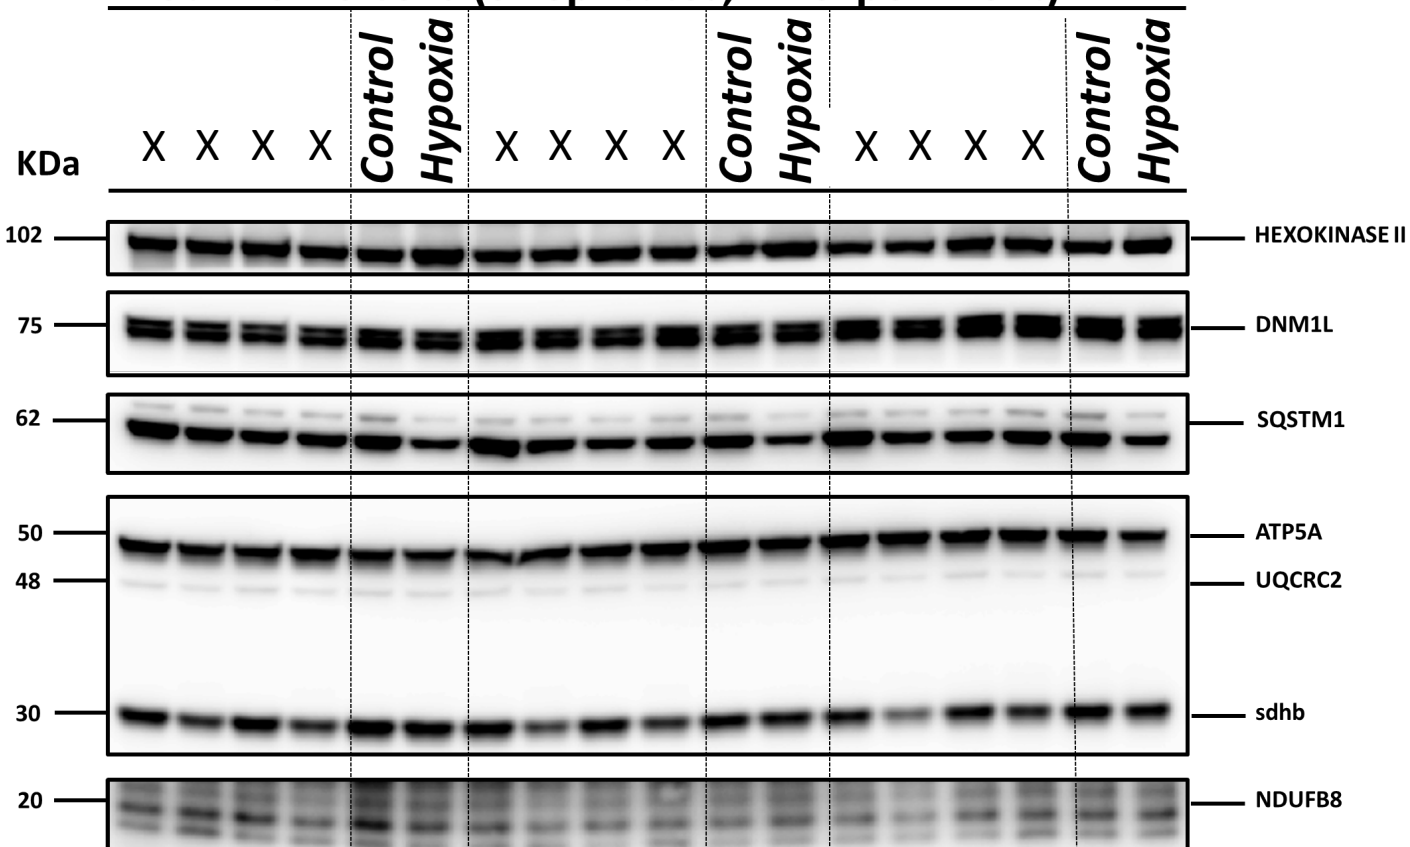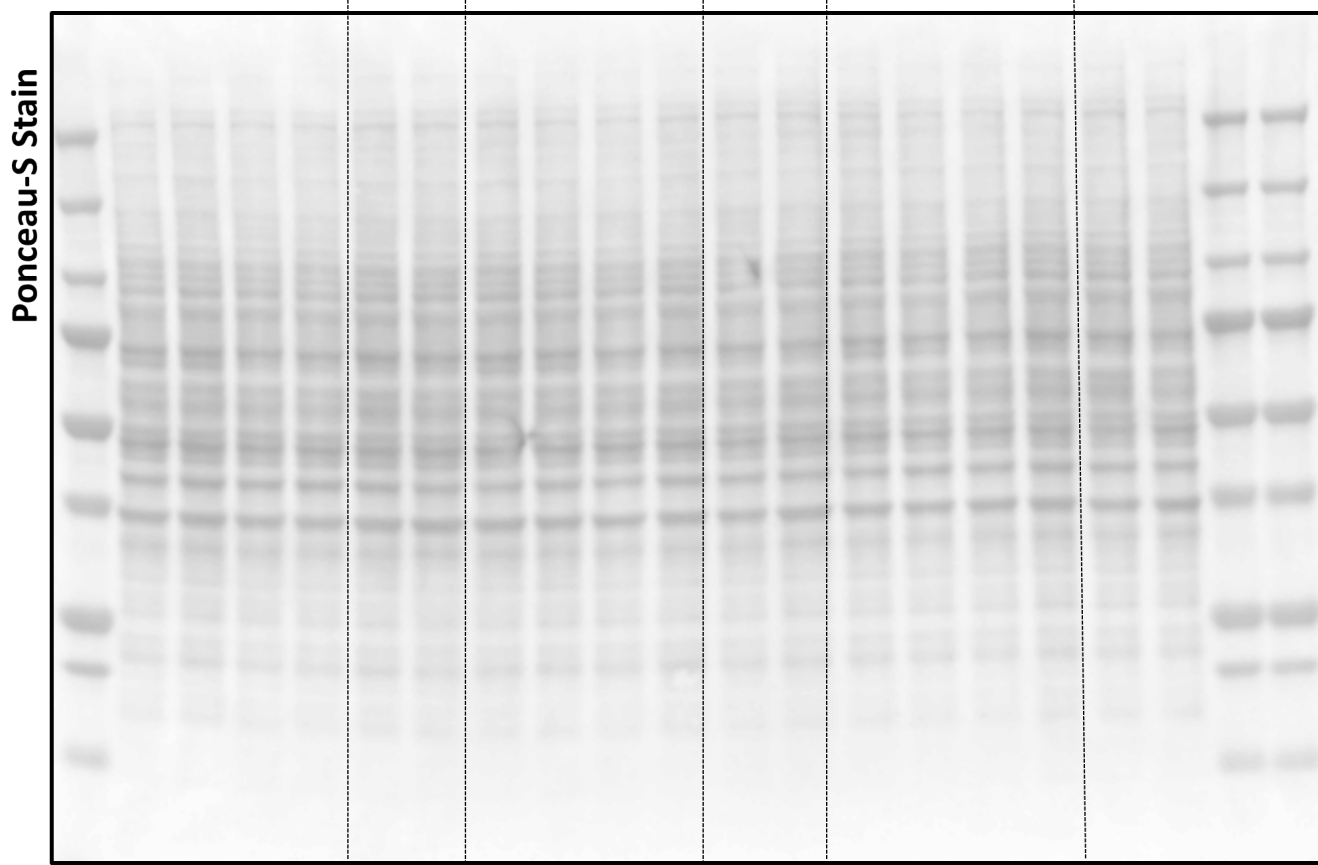

X: Conditions not relevant to for this research paper

**Blot II BeWo cells (3 replicates, 1<sup>st</sup> experiment)**

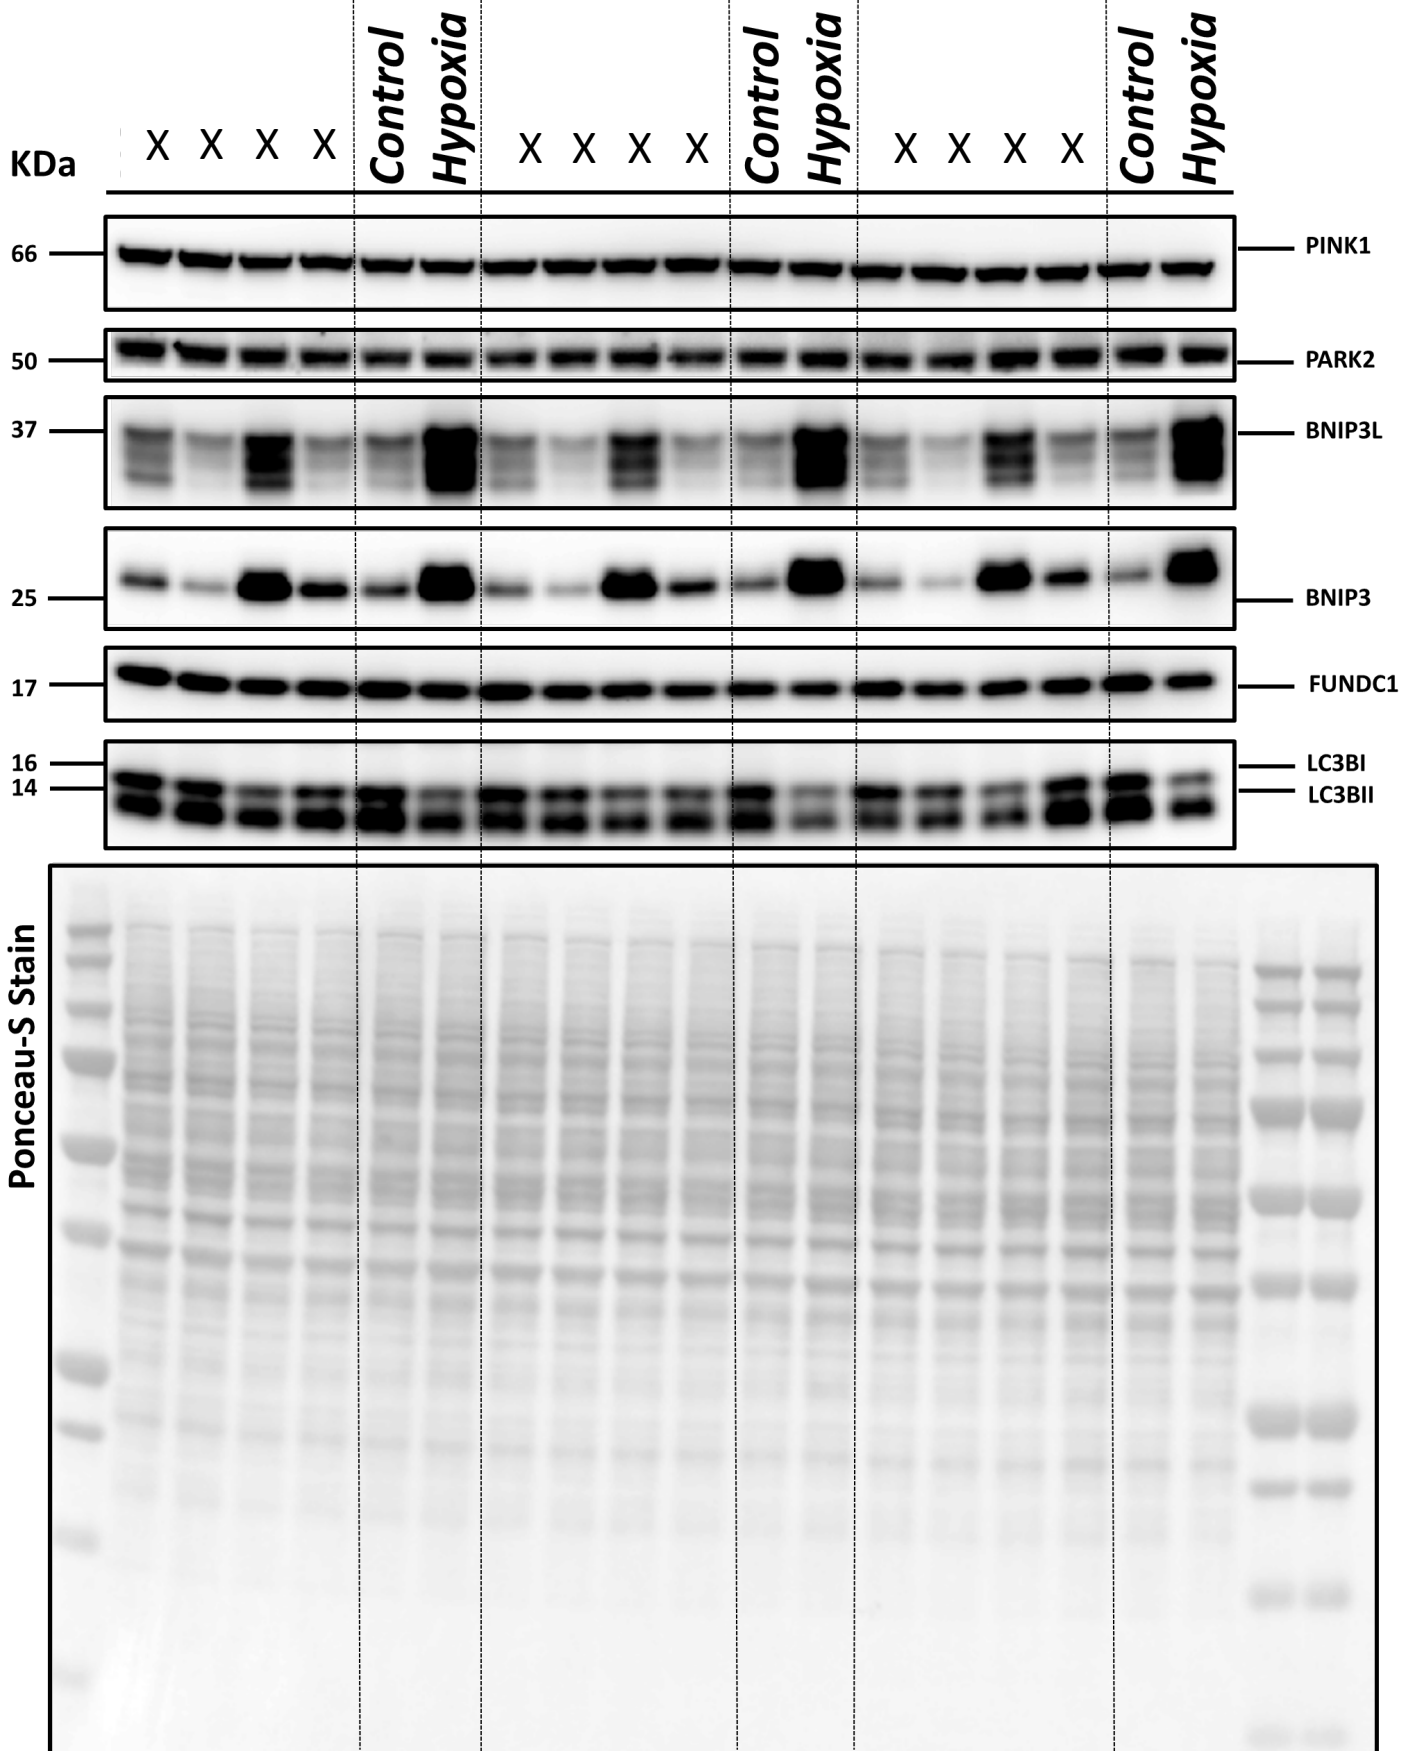

X: Conditions not relevant to for this research paper

### Blot III BeWo cells (3 replicates, 1<sup>st</sup> experiment)

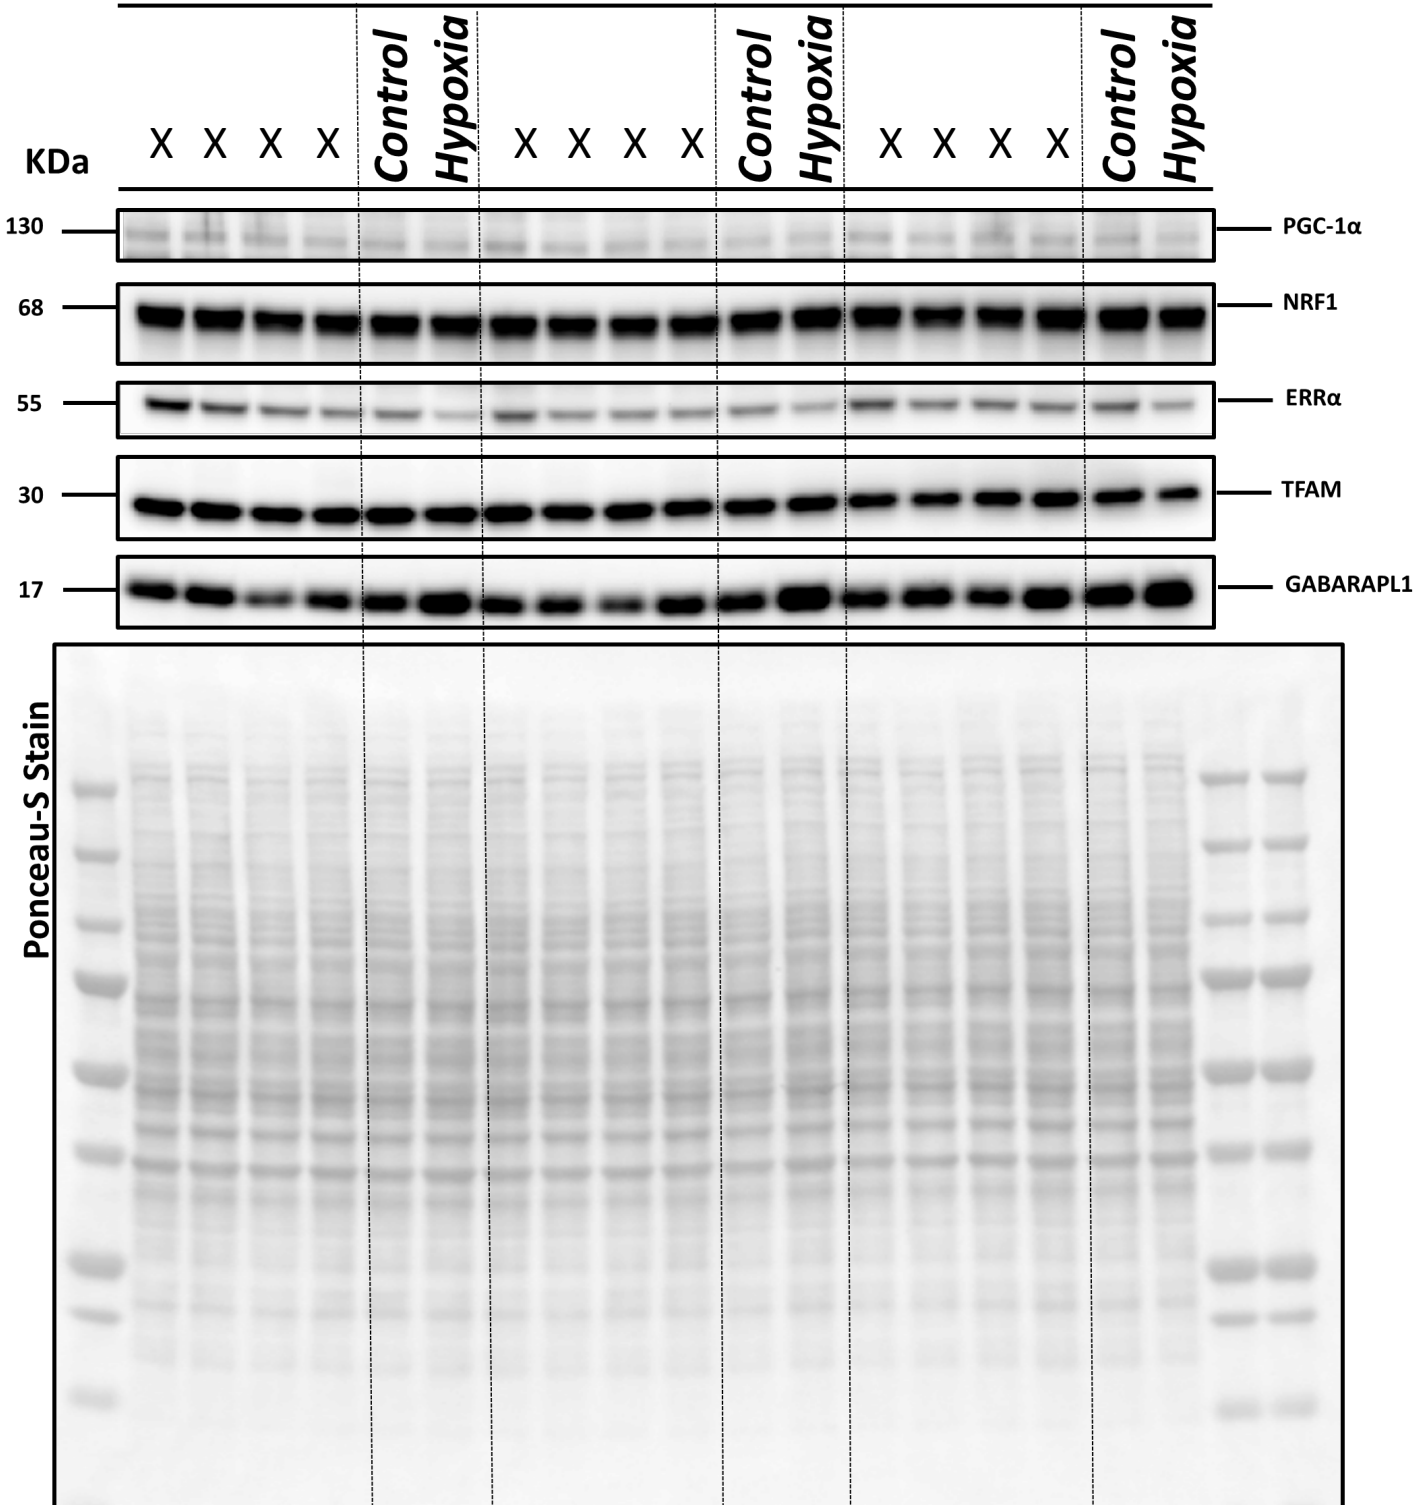

X: Conditions not relevant for this research paper

**Blot IV BeWo cells (3 replicates, 1st experiment)**

**1<sup>st</sup> experiment**

*Hypoxia*  
*Control*    *Hypoxia*  
*Control*    *Hypoxia*  
*Control*

KDa

19

17

Cleaved Caspase-3

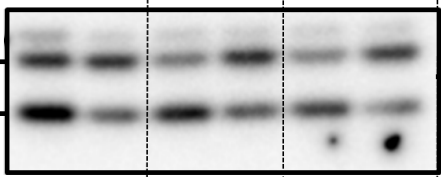

**Ponceau-S Stain**

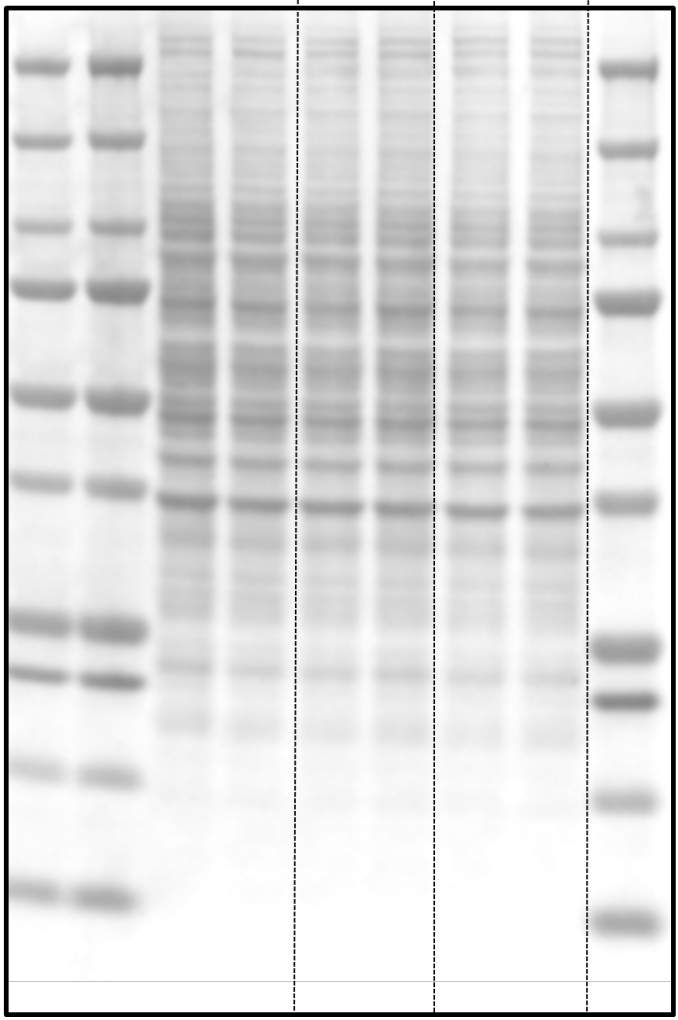

Blot I BeWo cells (6 replicates, 2<sup>nd</sup> and 3<sup>th</sup> experiment)

2<sup>nd</sup> experiment

3<sup>th</sup> experiment

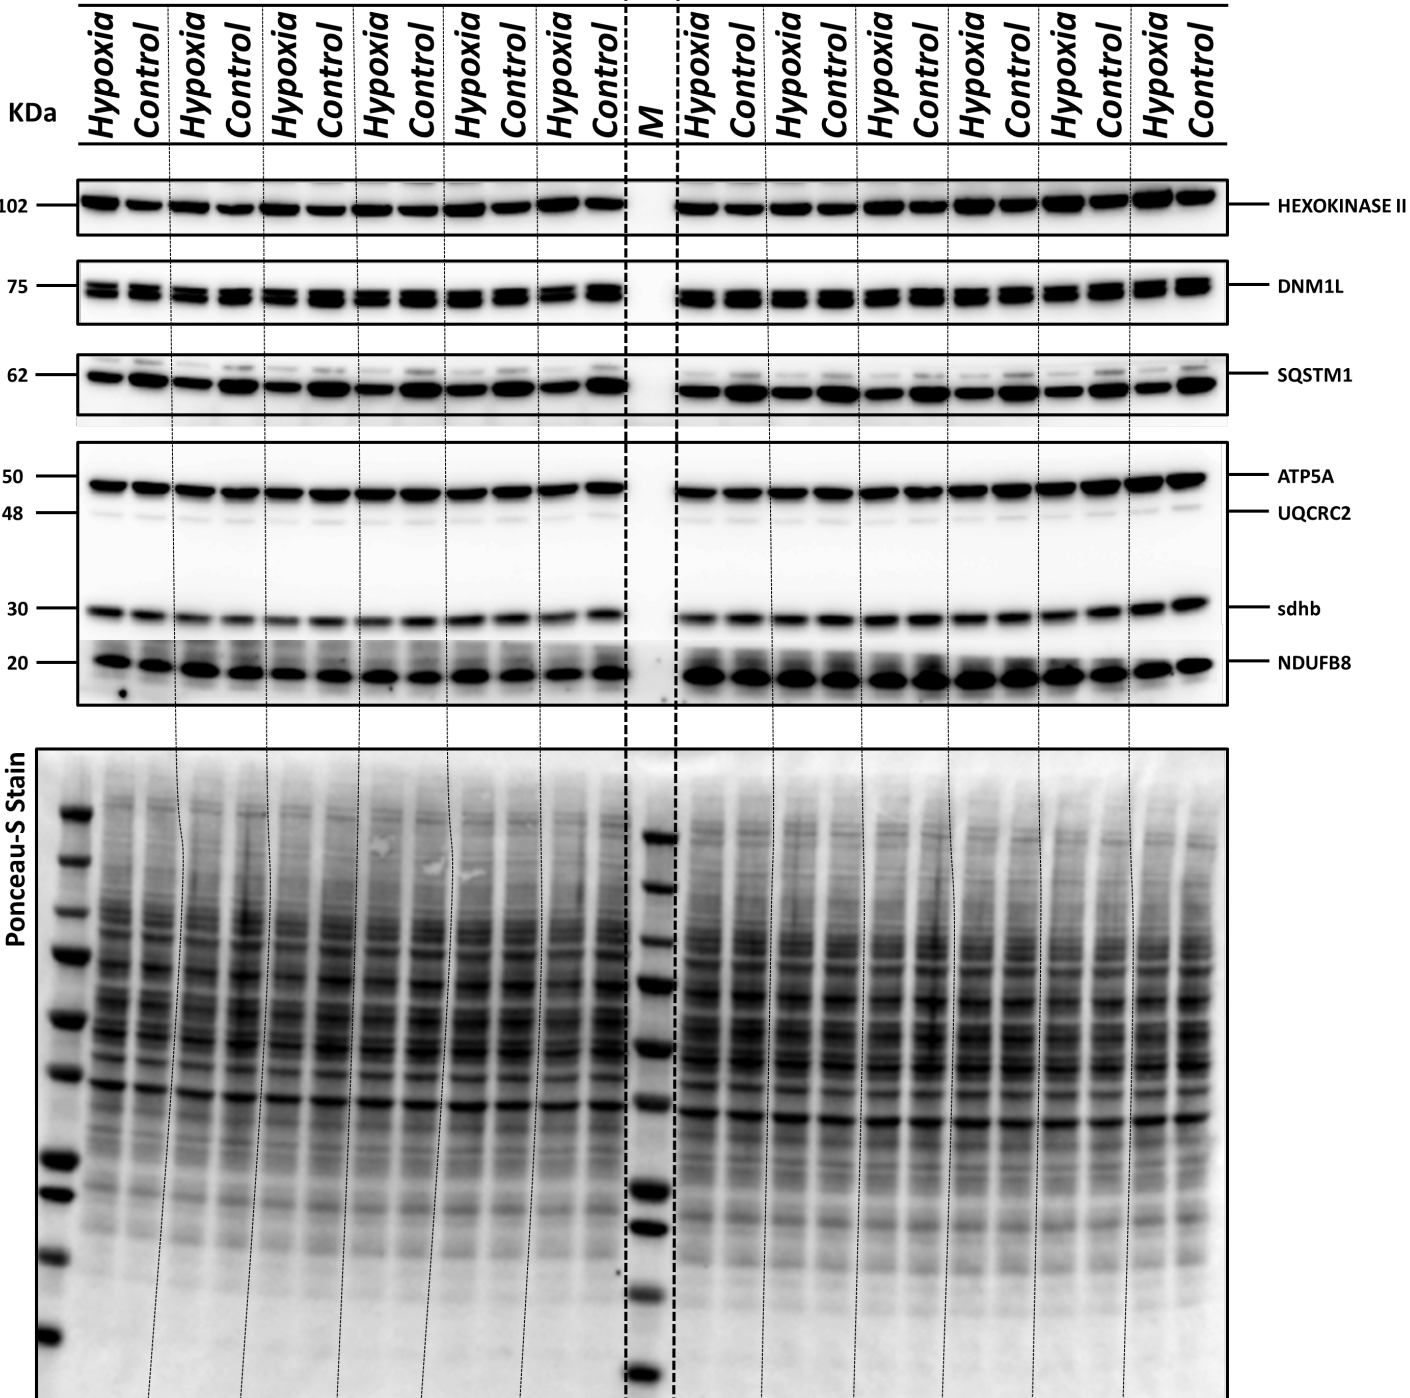

Blot II BeWo cells (6 replicates, 2<sup>nd</sup> and 3<sup>th</sup> experiment)

2<sup>nd</sup> experiment

3<sup>th</sup> experiment

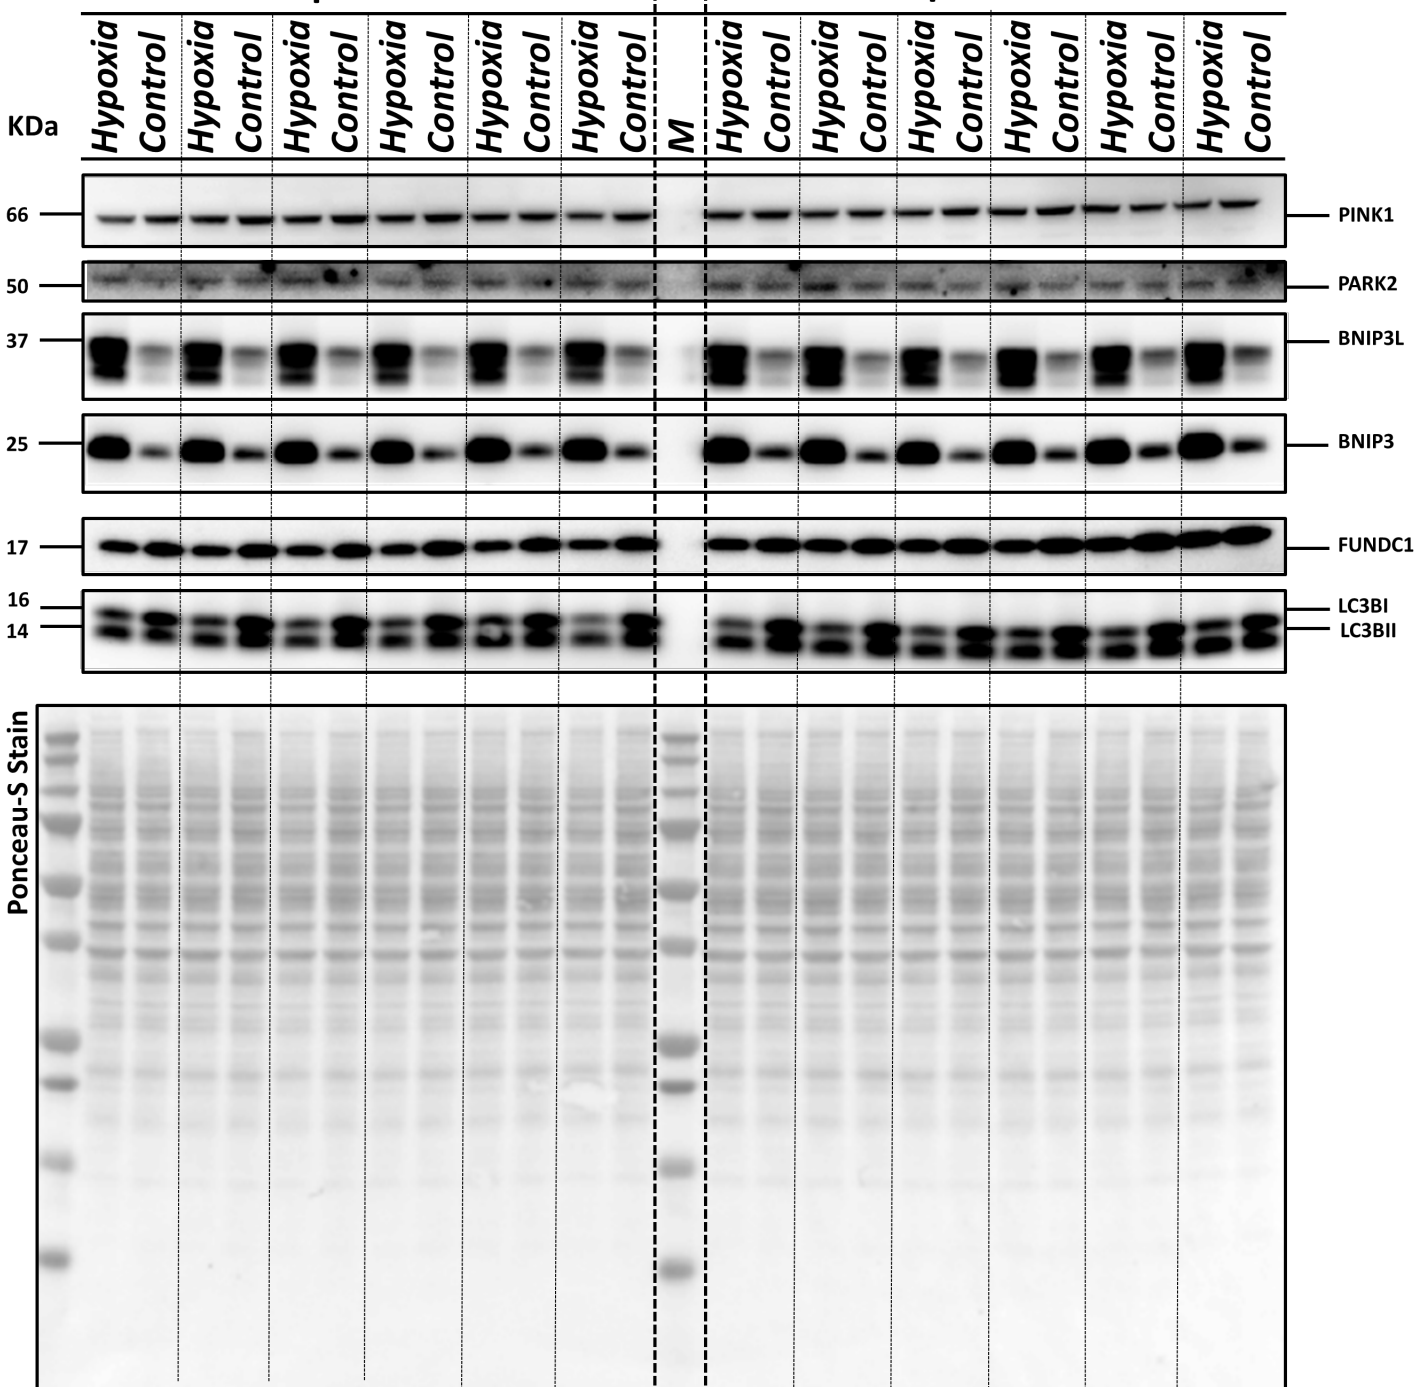

Blot III BeWo cells (6 replicates, 2<sup>nd</sup> and 3<sup>th</sup> experiment)

2<sup>nd</sup> experiment

3<sup>th</sup> experiment

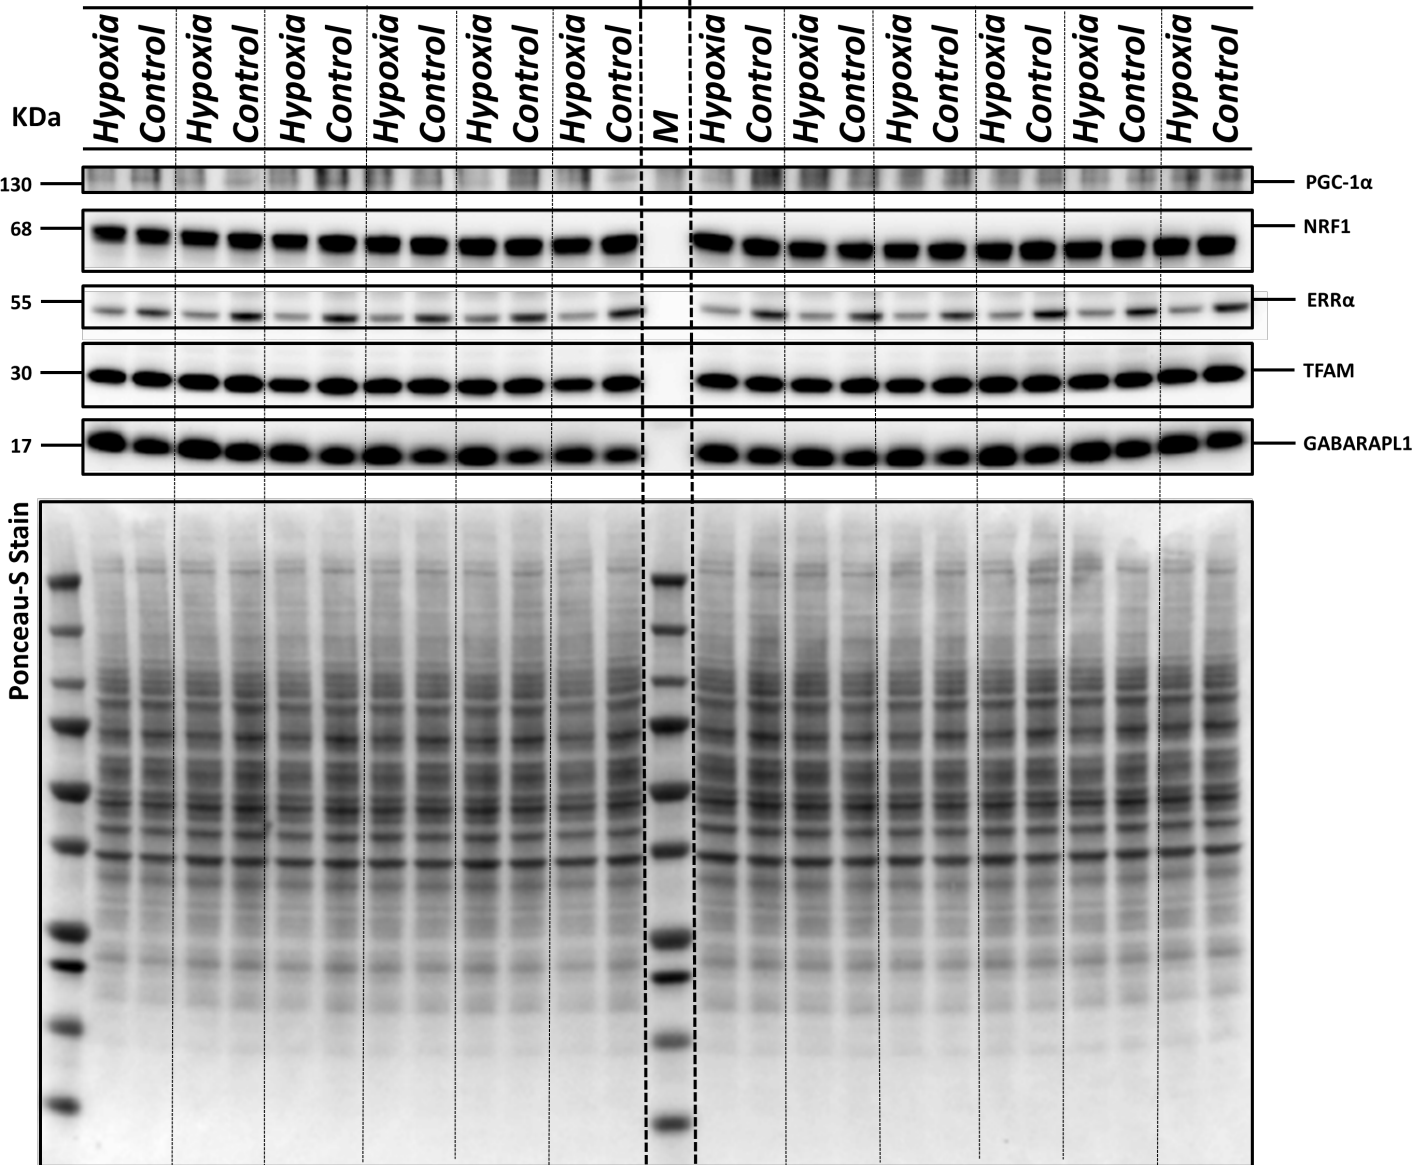

Blot IV BeWo cells (6 replicates, 2th and 3th experiment)

2<sup>th</sup> experiment

3<sup>th</sup> experiment

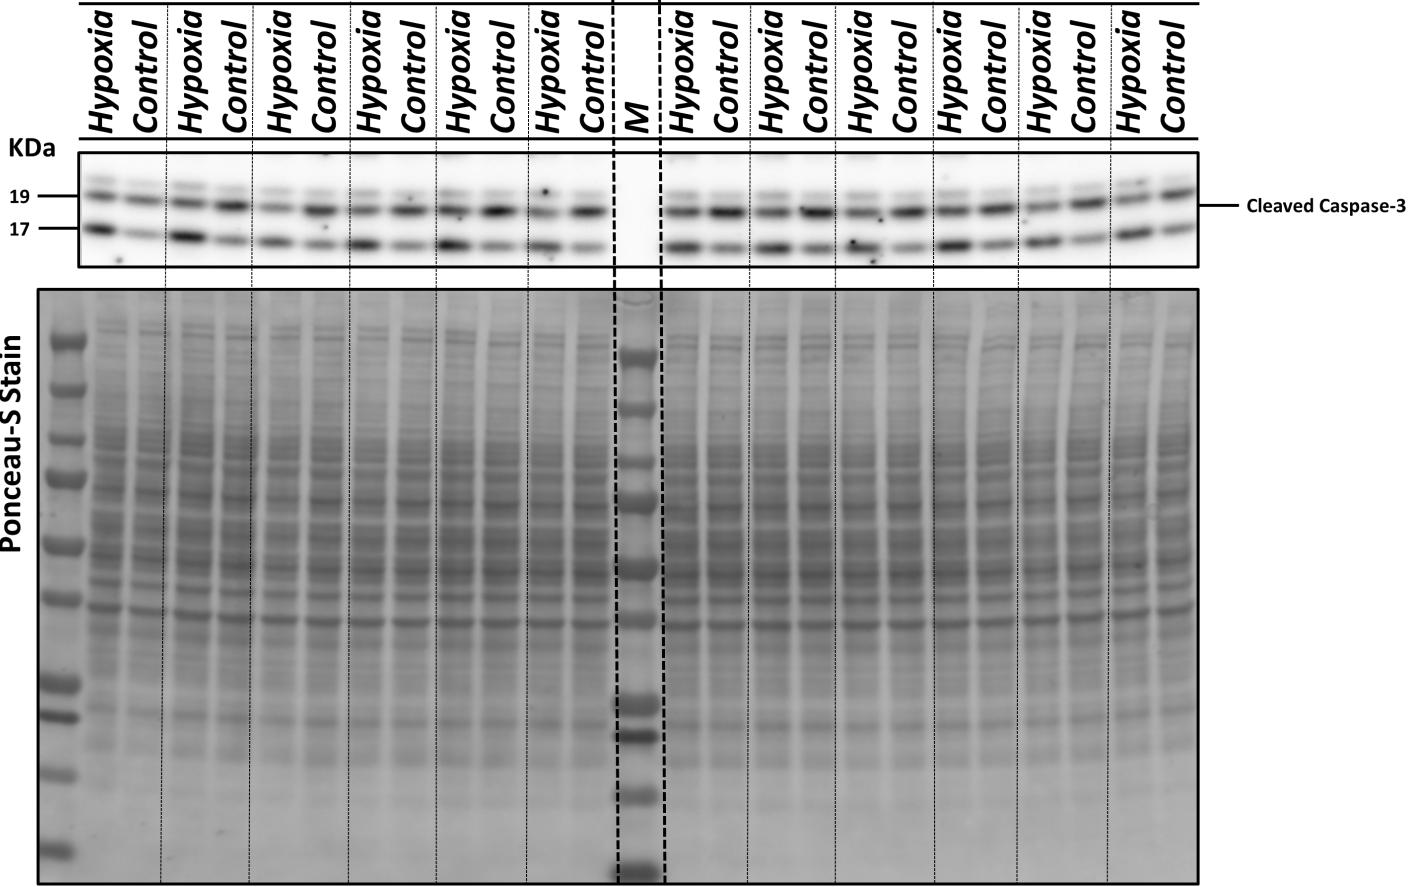



# Blot I placental explants

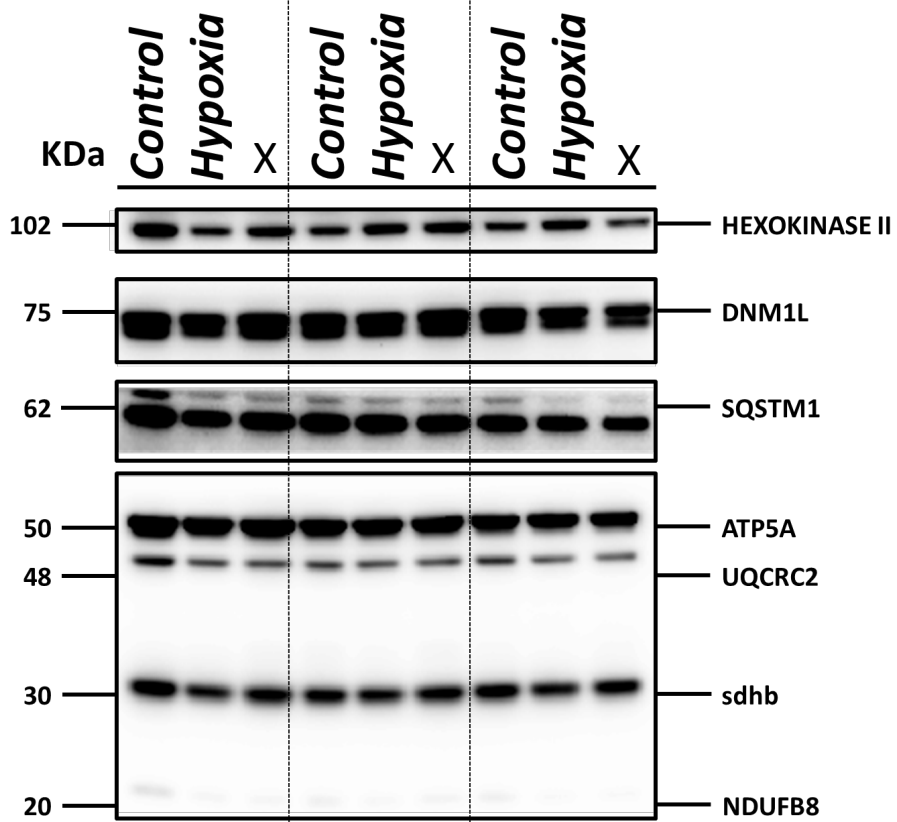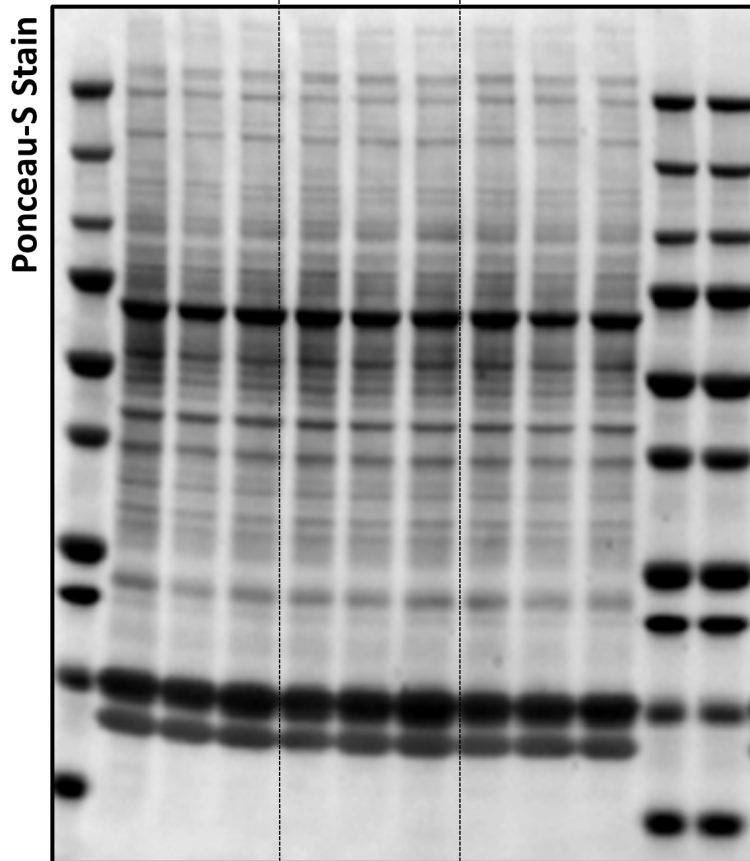

X: Conditions not relevant to for this research paper

# Blot I placental explants

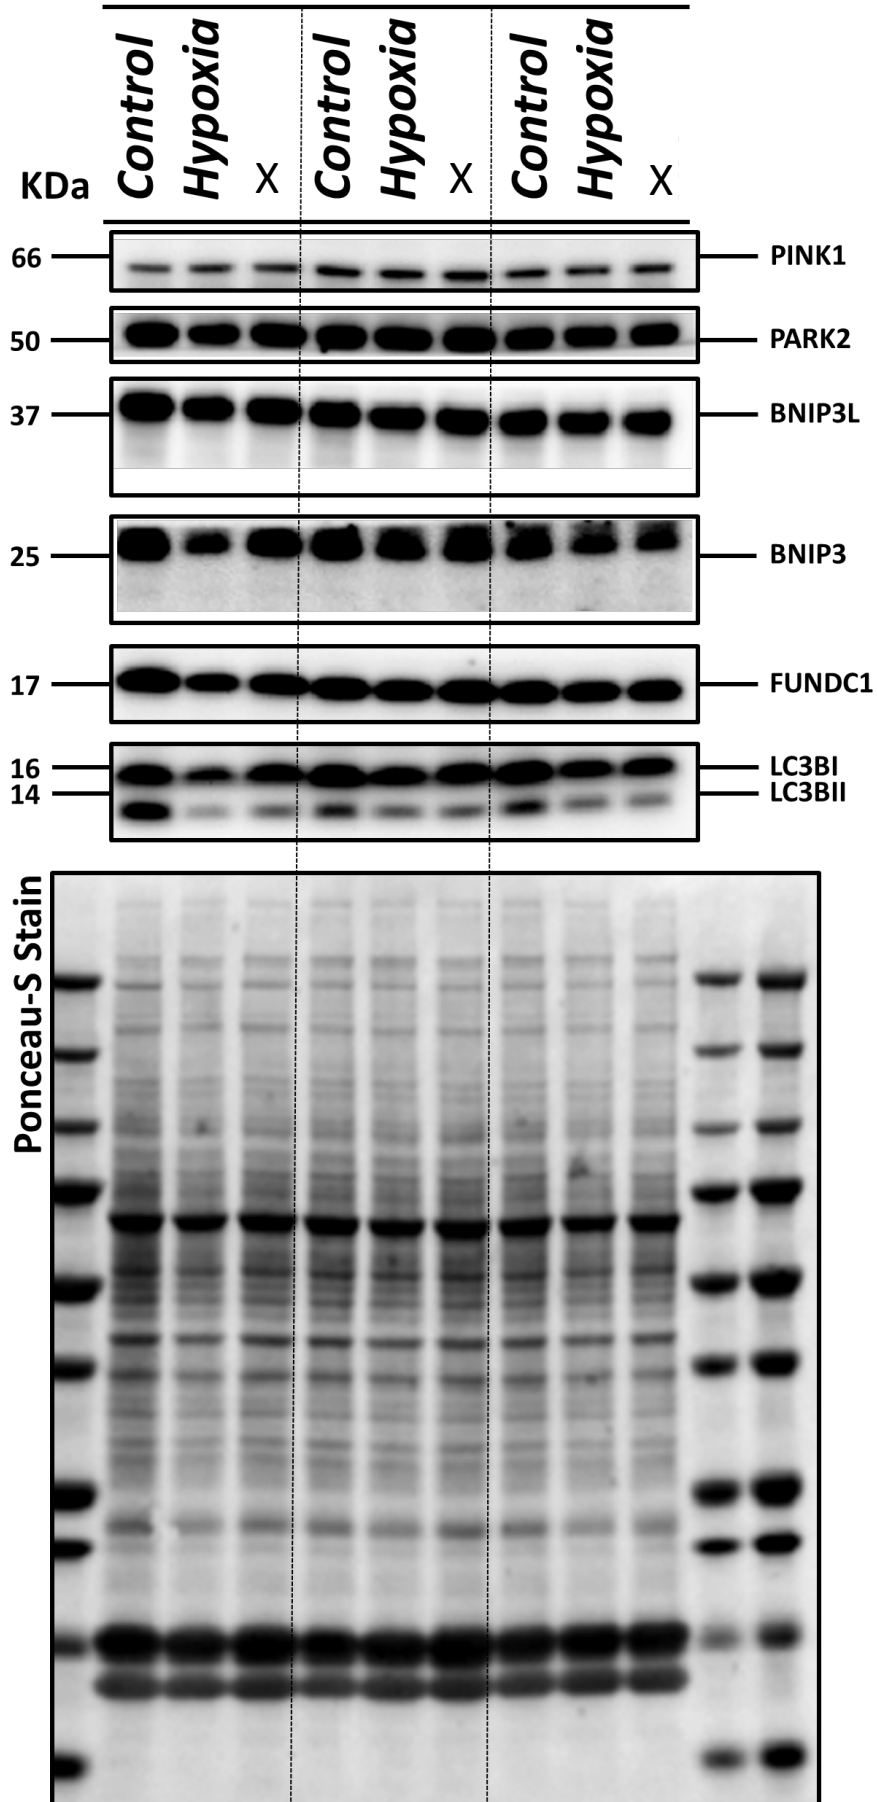

X: Conditions not relevant to for this research paper

# Blot I placental explants

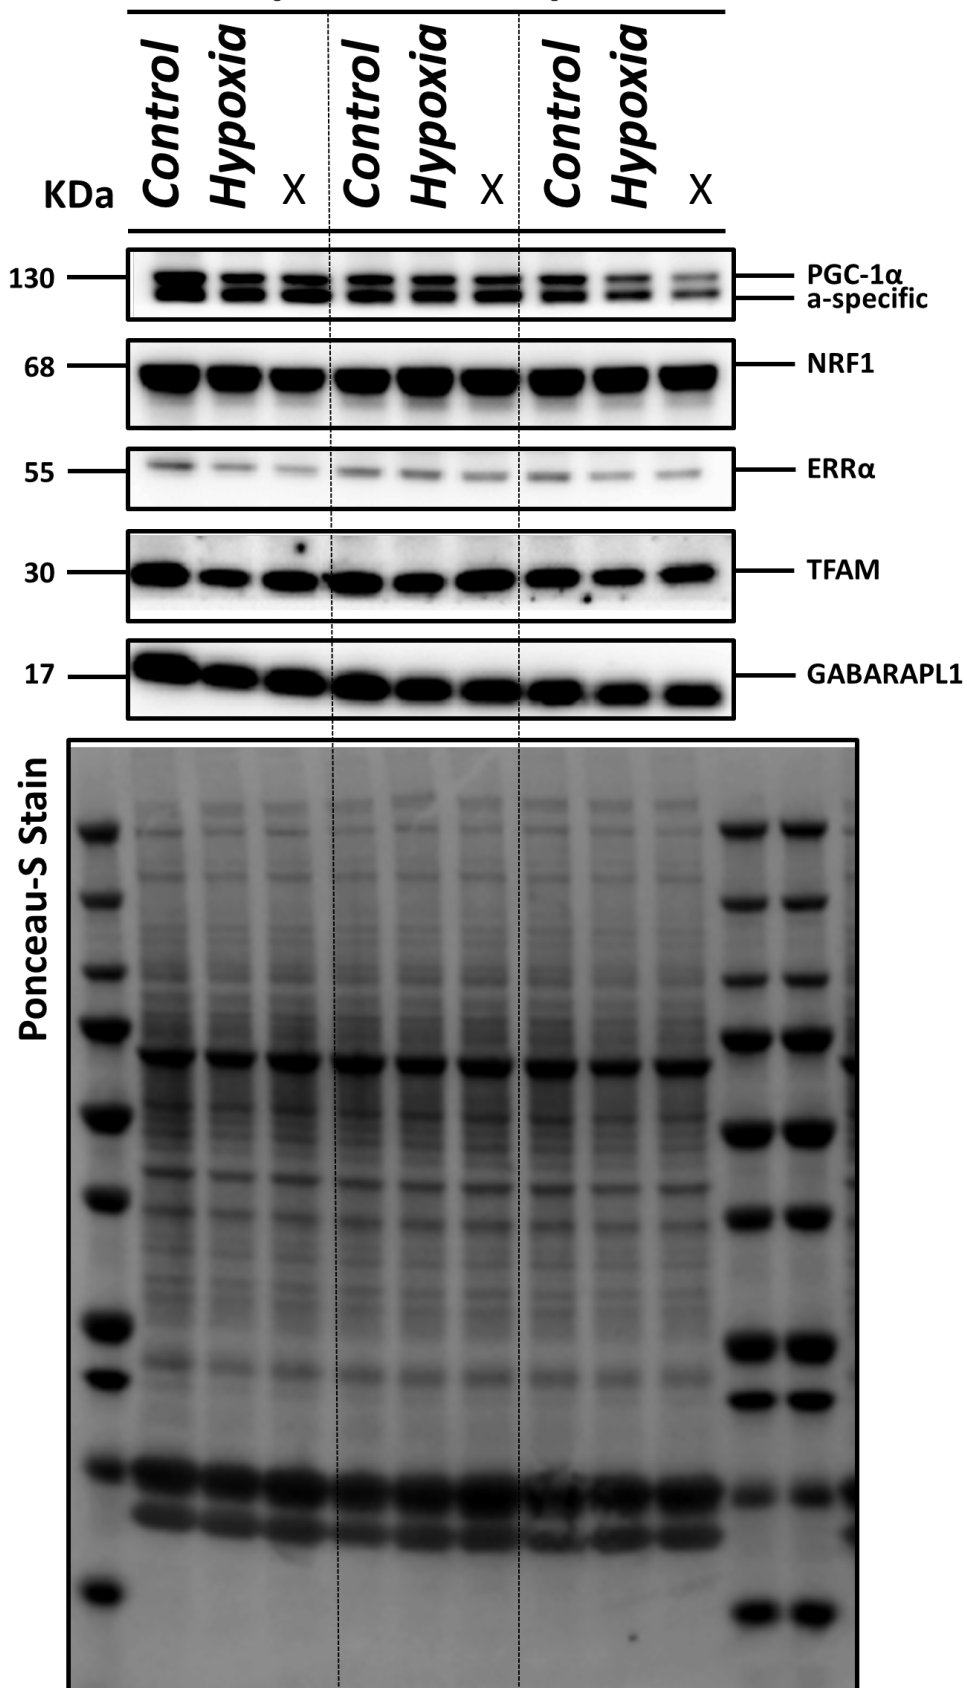

X: Conditions not relevant to for this research paper
